# Supplementary material for: Xenografting of human umbilical mesenchymal stem cells from Wharton’s jelly ameliorates mouse spinocerebellar ataxia type 1
Source: PubMed Central journal article supplement (PMC6727337; doi:10.1186/s40035-019-0166-8), 2019-09-05
Supplement: 40035_2019_166_MOESM2_ESM.pdf [file 40035_2019_166_MOESM2_ESM.pdf]

## Supplemental Figure 2

- **The method of purkinje cells counting using anti-calbindin immunostaining**

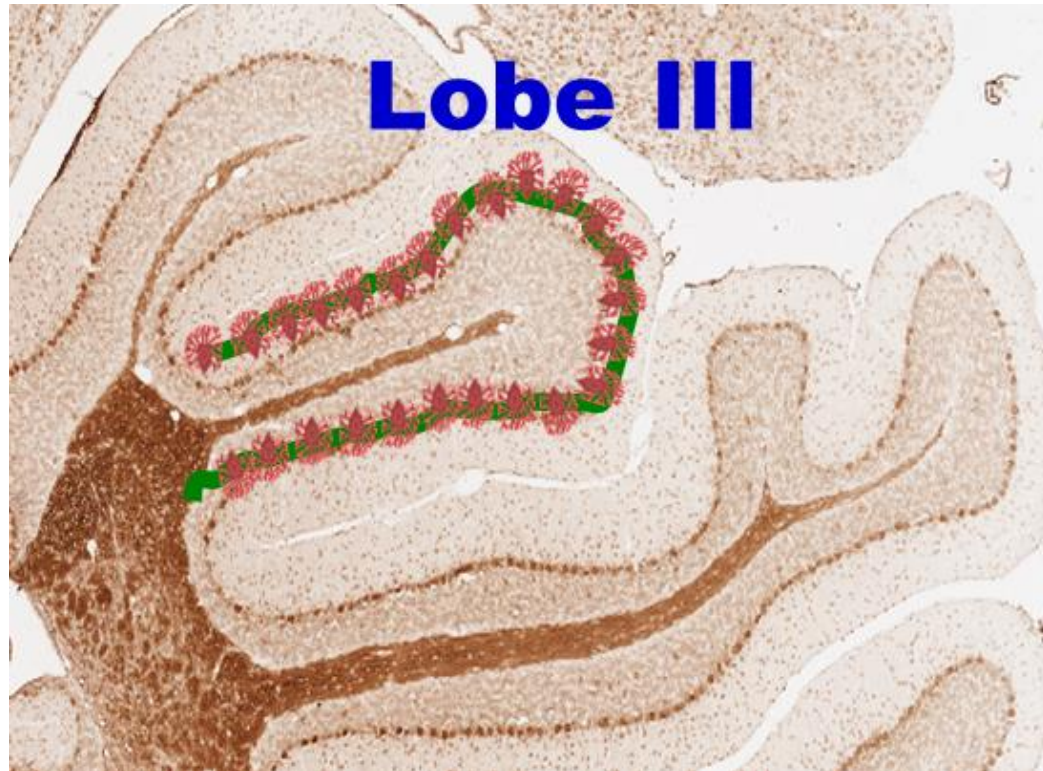

**The total number of purkinje cell in Lobe III**

**Total length of purkinje cell layer in Lobe III  
(the length of the green line)**
