# Supplementary material for: Xenografting of human umbilical mesenchymal stem cells from Wharton’s jelly ameliorates mouse spinocerebellar ataxia type 1
Source: PubMed Central journal article supplement (PMC6727337; doi:10.1186/s40035-019-0166-8), 2019-09-05

# Supplemental Figure 3

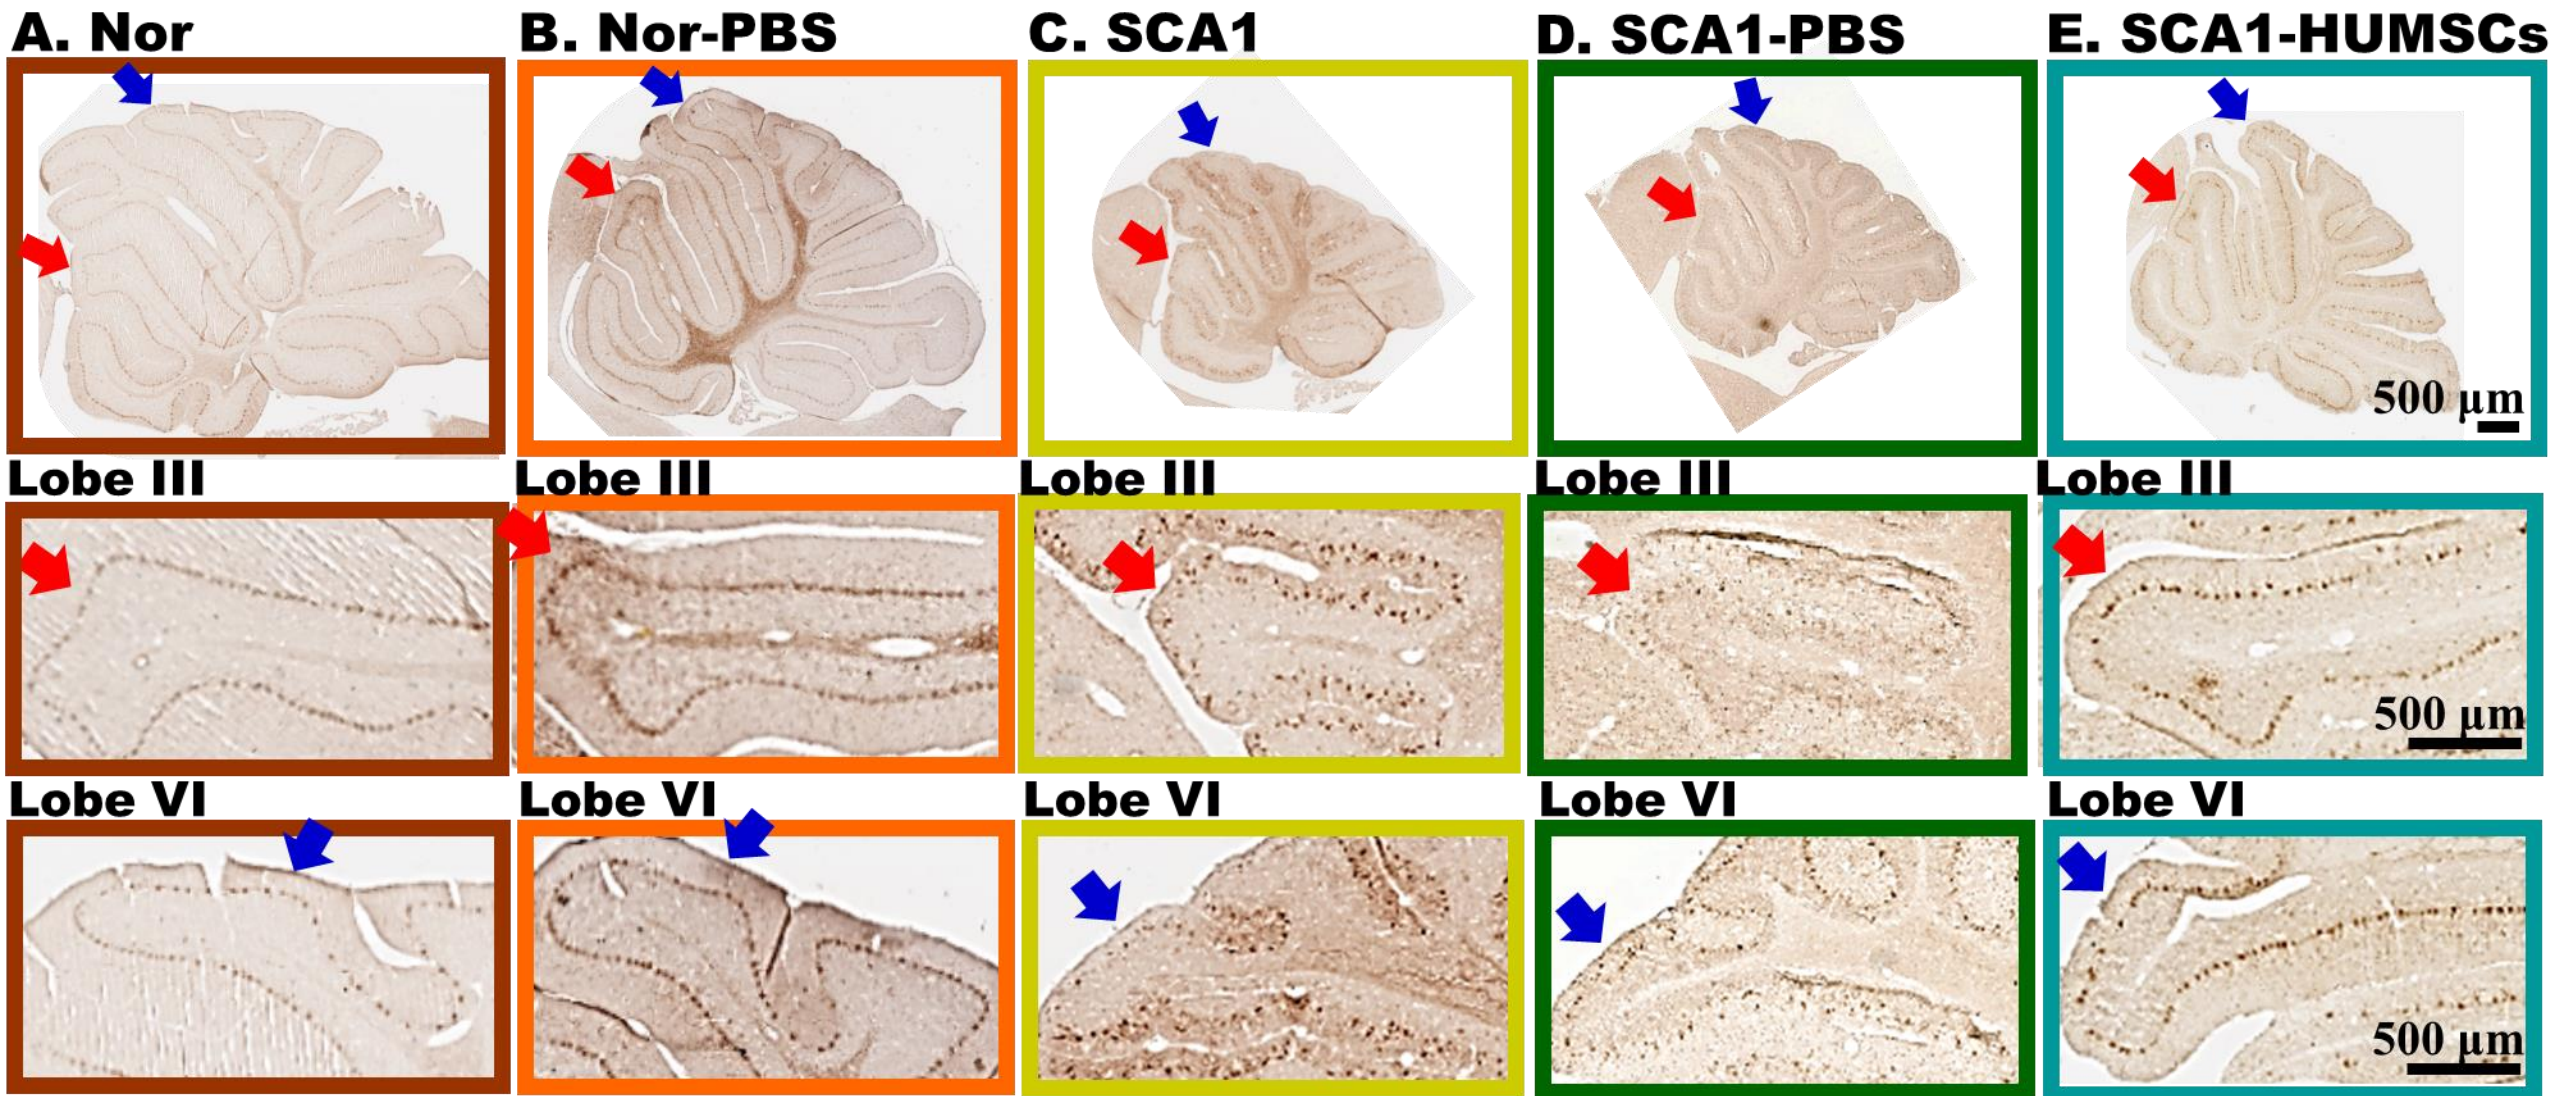

Supplement: 40035_2019_166_MOESM3_ESM.pdf [file 40035_2019_166_MOESM3_ESM.pdf]
